# Supplementary material
Source: publisher figshare collection journal article supplement (https://acs.figshare.com/ndownloader/files/4668142)
Supplement: Supplementary file 1 [file 4668142]

# Supporting Information

## Salicylidene Schiff Base Assembled with Mesoporous Silica SBA-15 as Hybrid Materials for Molecular Logic Function

*Liyan Zhao, Shichao Wang, Ying Wu, Qiufei Hou, Yue Wang, Shimei Jiang\**

Key Laboratory for Supramolecular Structure and Materials of Ministry of Education, Jilin University,  
2699 Qianjin Street, Changchun 130012, P. R. China.

E-mail: [smjiang@jlu.edu.cn](mailto:smjiang@jlu.edu.cn)

- The fluorescence spectra of the **SPEA/SBA-15** hybrid stimulated by the  $\text{OH}^-$  .....S2
- The fluorescence spectra of the **SPEA/SBA-15** hybrid stimulated by the  $\text{Zn}^{2+}$  .....S2
- The fluorescence spectra of the **SPEA/SBA-15** hybrid stimulated by the UV light.....S3
- The fluorescence spectra of the **SPEA/SBA-15** hybrid stimulated by the combinational actions of  $\text{OH}^-$  and  $\text{Zn}^{2+}$  .....S3
- The fluorescence spectra of the **SPEA/SBA-15** hybrid stimulated by the combinational actions of  $\text{OH}^-$  and UV light .....S4
- The fluorescence spectra of the **SPEA/SBA-15** hybrid stimulated by the combinational actions of  $\text{Zn}^{2+}$  and UV light.....S4
- The fluorescence spectra of the **SPEA/SBA-15** hybrid stimulated by the combinational actions of  $\text{OH}^-$ ,  $\text{Zn}^{2+}$  and UV light.....S5
- The fluorescence spectra of the complex of **SPEA** with  $\text{Zn}^{2+}$  at various concentrations.....S5
- The fluorescence spectra for the molecular aggregation of the deprotonated **SPEA**.....S6

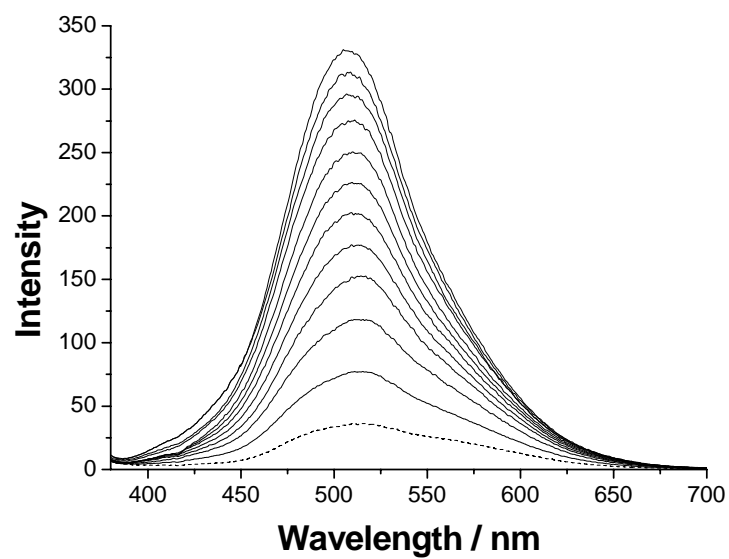

**FIGURE S-1:** The fluorescence spectra of the **SPEA/SBA-15** hybrid before (dash line) and after (solid line) stimulated by the  $\text{OH}^-$ .

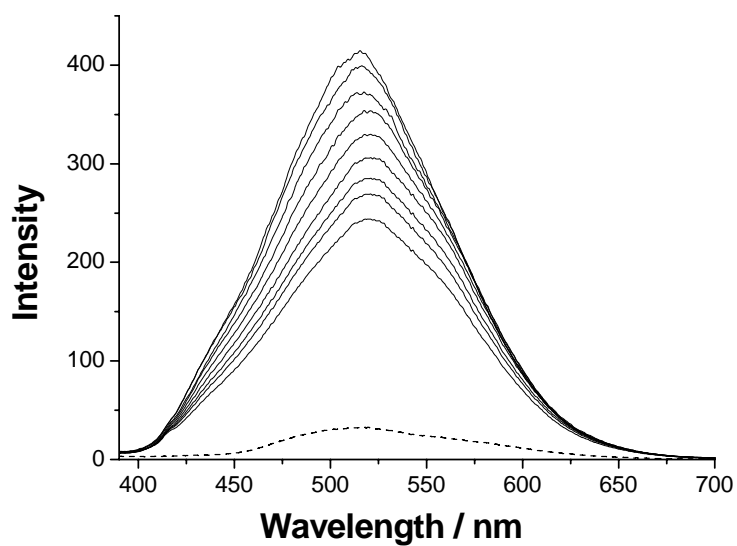

**FIGURE S-2.** The fluorescence spectra of the **SPEA/SBA-15** hybrid before (dash line) and after (solid line) stimulated by the  $\text{Zn}^{2+}$ .

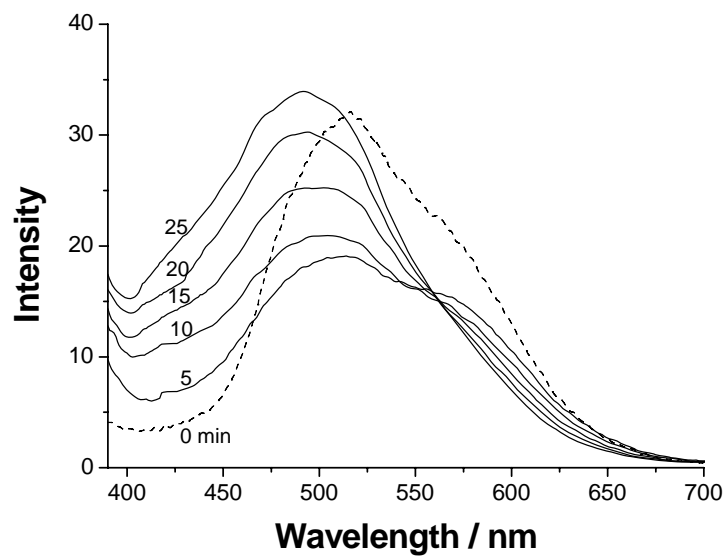

**FIGURE S-3.** The fluorescence spectra of the **SPEA/SBA-15** hybrid before (dash line) and after (solid line) stimulated by the UV light.

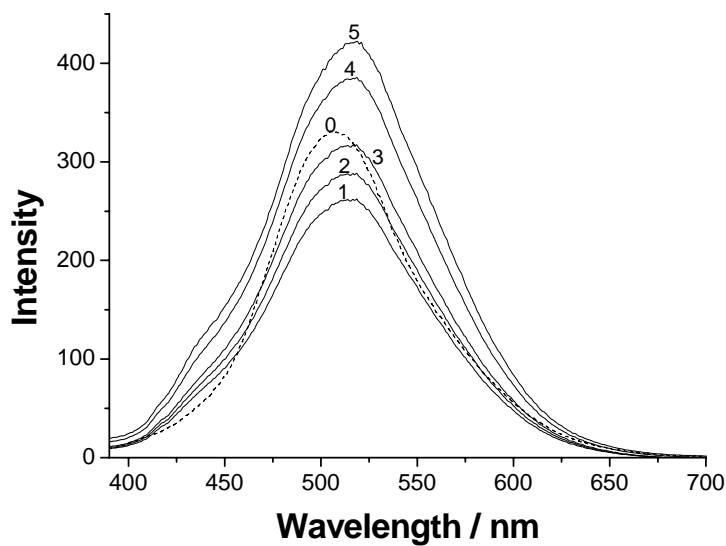

**FIGURE S-4.** The fluorescence spectra of the **SPEA/SBA-15** hybrid stimulated by the combinational actions of  $\text{OH}^-$  and  $\text{Zn}^{2+}$ . Dash line represents after titration of  $\text{OH}^-$  and solid lines represent sequentially titration of  $\text{Zn}^{2+}$ .

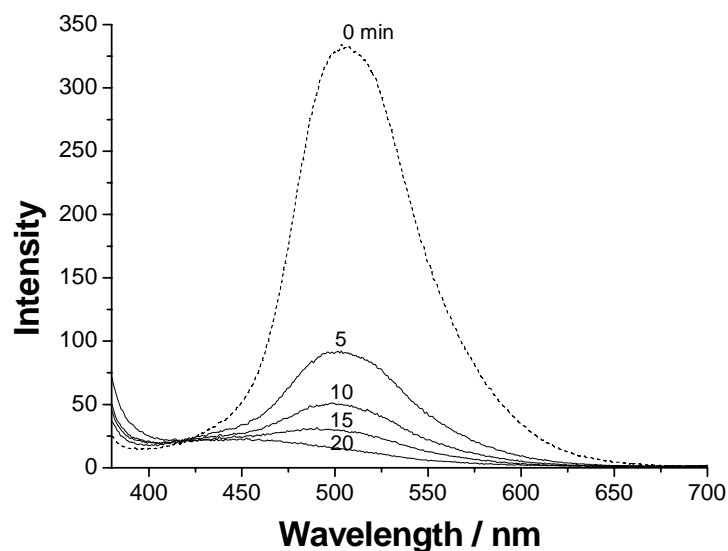

**FIGURE S-5.** The fluorescence spectra of the **SPEA/SBA-15** hybrid stimulated by the combinational actions of  $\text{OH}^-$  and UV light. Dash line represents after titration of  $\text{OH}^-$  and solid lines represent sequentially irradiation by UV light.

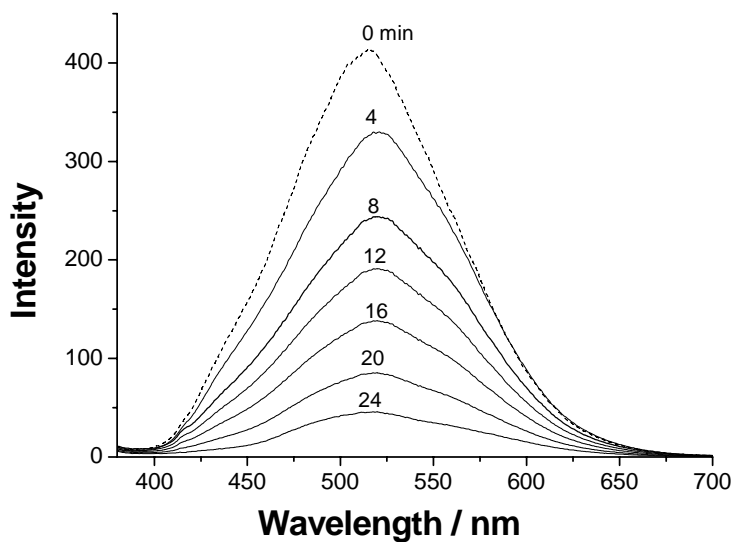

**FIGURE S-6.** The fluorescence spectra of the **SPEA/SBA-15** hybrid stimulated by the combinational actions of  $\text{Zn}^{2+}$  and UV light. Dash line represents after titration of  $\text{Zn}^{2+}$  and solid lines represent sequentially irradiation by UV light.

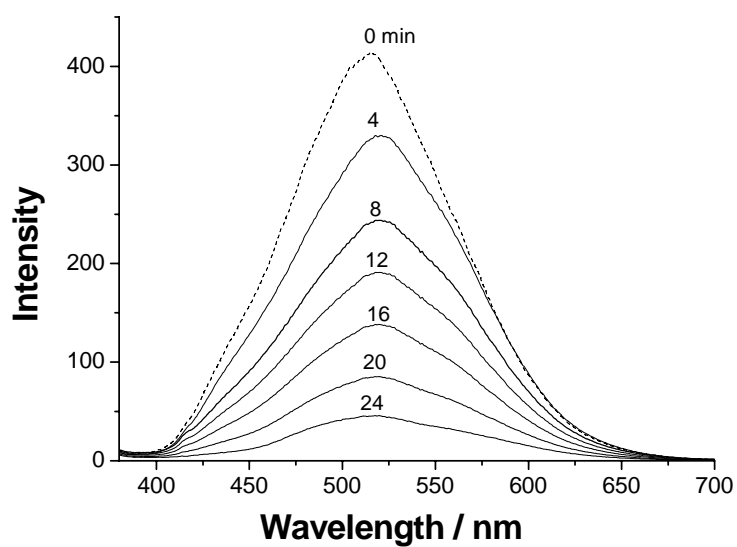

**FIGURE S-7.** The fluorescence spectra of the **SPEA/SBA-15** hybrid stimulated by the combinational actions of  $\text{OH}^-$ ,  $\text{Zn}^{2+}$  and UV light. Dash line represents after titration of  $\text{OH}^-$  and  $\text{Zn}^{2+}$ ; solid lines represent sequentially irradiation by UV light.

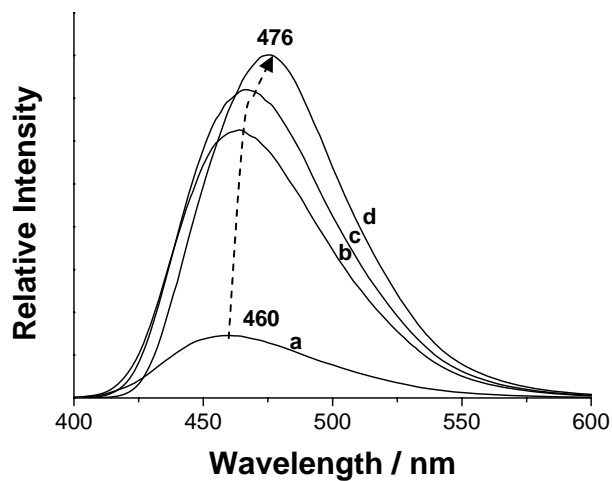

**FIGURE S-8.** The fluorescence spectra ( $\lambda_{\text{ex}} = 370 \text{ nm}$ ) of the complex of **SPEA** with  $\text{Zn}^{2+}$  at various concentrations, **a**:  $1 \times 10^{-6} \text{ mol/L}$ ; **b**:  $1 \times 10^{-5} \text{ mol/L}$ ; **c**:  $1 \times 10^{-4} \text{ mol/L}$ ; **d**:  $1 \times 10^{-3} \text{ mol/L}$ .

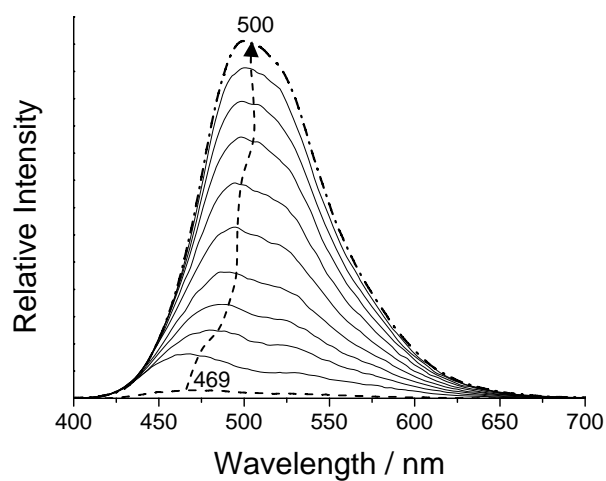

**FIGURE S-9.** The fluorescence spectra ( $\lambda_{\text{ex}} = 370$  nm) for the molecular aggregation of the deprotonated **SPEA** at  $1 \times 10^{-3}$  mol/L, the time interval is 10 min.
